# Supplementary material
Source: Springer Nature journal article supplement (https://www.springermedizin.de/resource/supplementary/13049_2013_643_MOESM3_ESM.pdf/9666918)

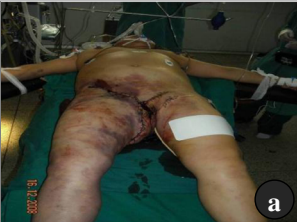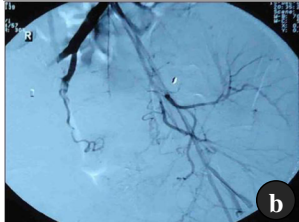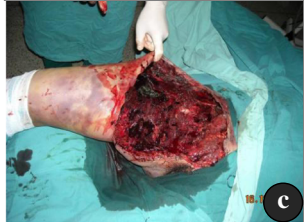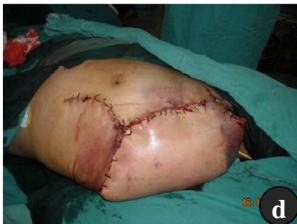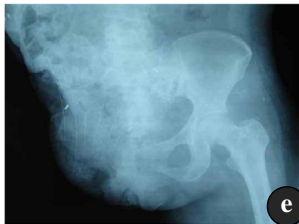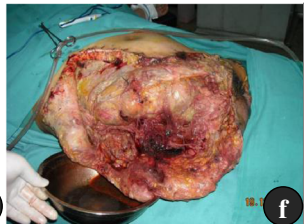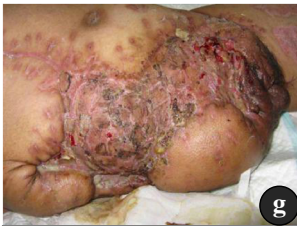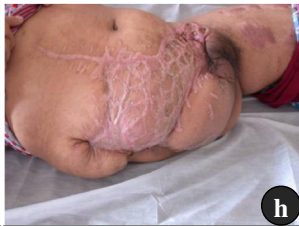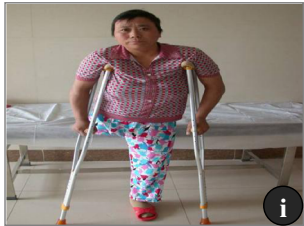

Supplement: MOESM3 [file 9666918]
